# Supplementary material for: Seasonal variability in global industrial fishing effort
Source: PLOS journal article supplement (doi:10.1371/journal.pone.0216819), 2019-05-17
Supplement: S4 (10.1371/journal.pone.0216819.s004) [file journal.pone.0216819.s004]

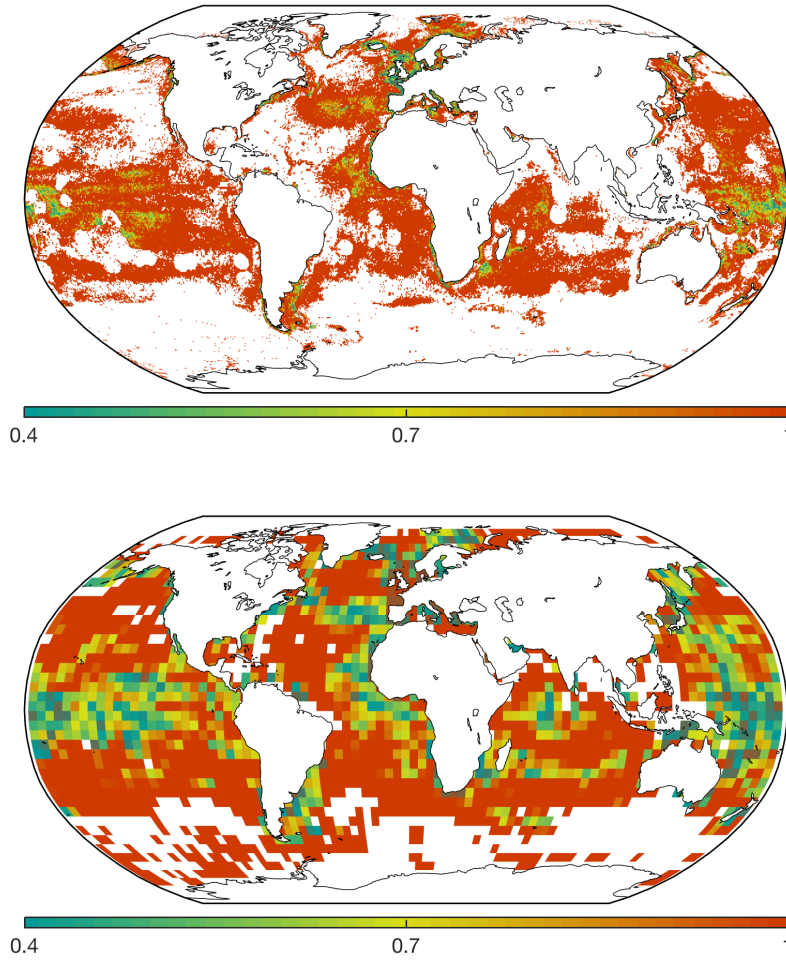

**S4 Fig. Effect of grid resolution.** (a) Spatial distribution of seasonality indicator  $SI$  at different grid resolutions (top  $0.5^\circ$  and bottom  $4.0^\circ$ ).

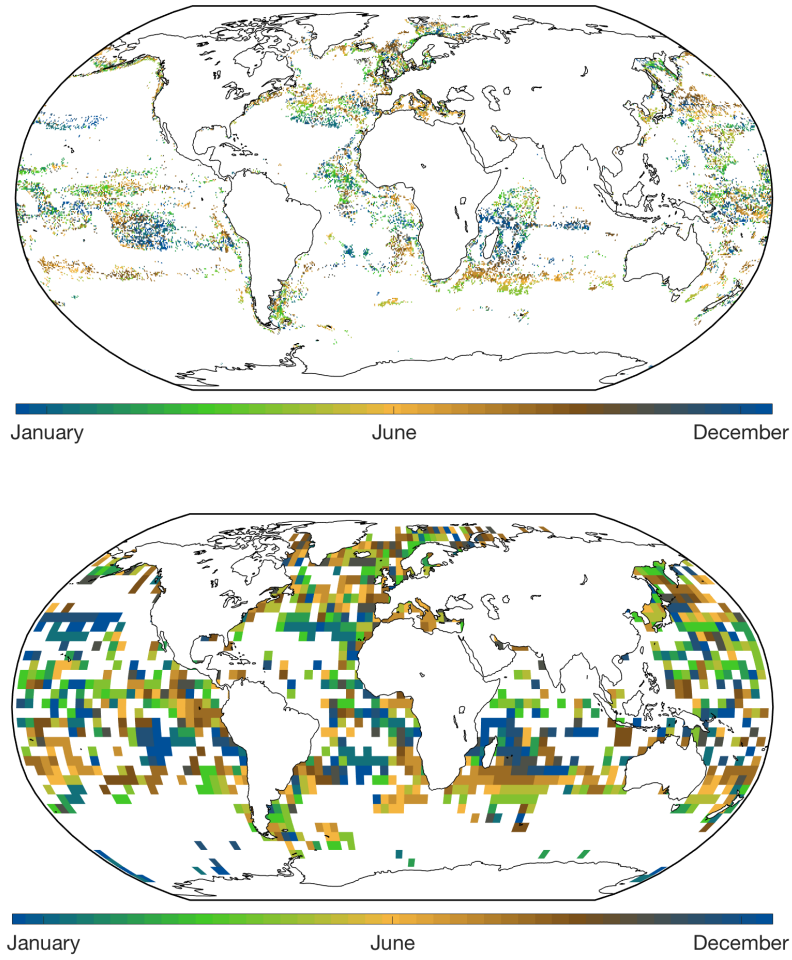

**S4 Fig. Effect of grid resolution.** (b) Months of the peak of fishing effort in all grid cells where a seasonal cycle is clearly identified for different grid resolutions (top 0.5° and bottom 4.0°).

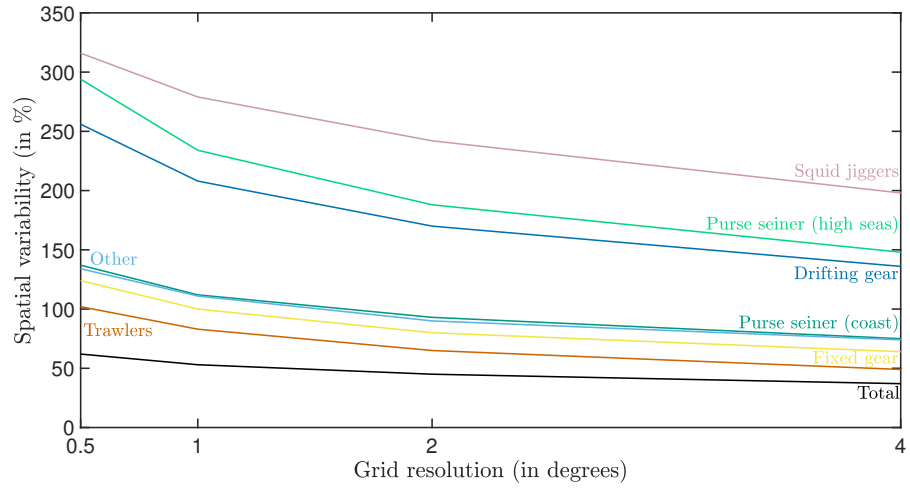

**S4 Fig. Effect of grid resolution.** (c) Mean local standard deviation  $\overline{sd(e_g^{i,j}/\bar{e}_g^{i,j})}$  computed when effort is binned on different grid resolutions.
